# Supplementary material for: CO2 adsorption on anatase TiO2(101) surfaces: a combination of UHV-FTIRS and first-principles studies
Source: Royal Society of Chemistry journal article supplement (doi:10.1039/c7cp05375d), 2017-01-01
Supplement: c7cp05375d1.pdf [file c7cp05375d1.pdf]

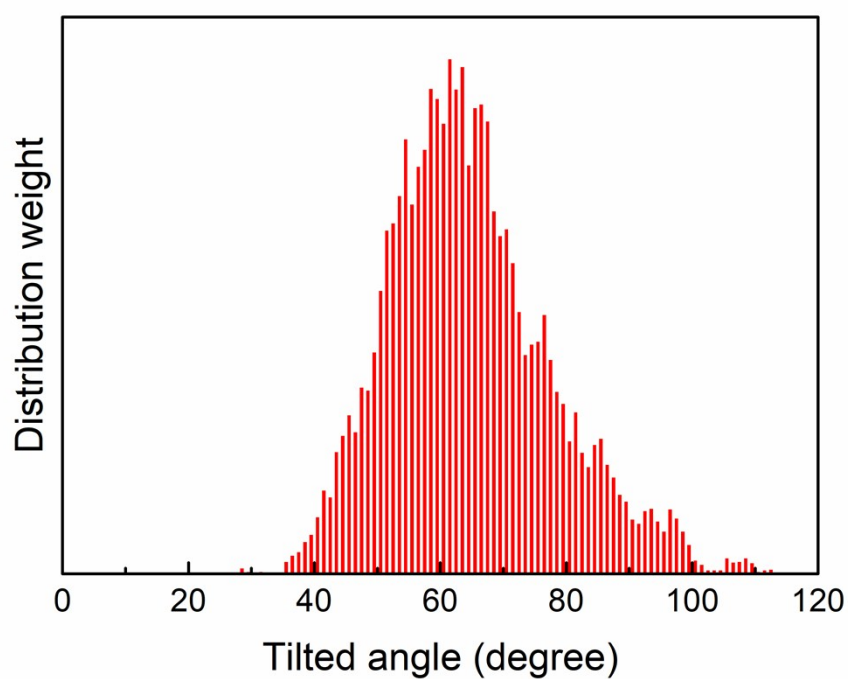

Fig. S1. The calculated tilted angle dependence of weight distribution of CO on the CO-CO<sub>2</sub> co-adsorbed a-TiO<sub>2</sub>(101) surface.
